# Supplementary material for: Regeneration of Magnetic Nanoparticles Used in the Removal of Pathogenesis-Related Proteins from White Wines
Source: MDPI journal article supplement (doi:10.3390/foods9010001), 2019-12-18
Supplement: s1 [file s1]

## Supplementary Materials

### **Regeneration of magnetic nanoparticles used in the removal of pathogenesis-related proteins from white wines**

*Agnieszka Mierczynska-Vasilev<sup>1,2\*</sup>, Geridi Qi<sup>1,3</sup>, Paul Smith<sup>1,4</sup>, Keren Bindon<sup>1</sup>, Krasimir Vasilev<sup>2,5</sup>*

The Australian Wine Research Institute, Waite Precinct, Hartley Grove Cnr Paratoo Road, Urrbrae (Adelaide) SA 5064, PO Box 197, Australia;

<sup>2</sup> Future Industries Institute, University of South Australia, Mawson Lakes Campus, Mawson Lakes 5095, Australia;

<sup>3</sup> School of Agriculture, Food and Wine, The University of Adelaide, PMB 1, Glen Osmond, SA 5064, Australia

<sup>4</sup> Wine Australia, Industry House, National Wine Centre, Cnr Botanic & Hackney Roads, Adelaide SA 5000, PO Box 2733, Australia

<sup>5</sup> School of Engineering, University of South Australia, Mawson Lakes Campus, Mawson Lakes 5095, Australia

Table S1. Basic chemical analysis of the wines used in this study.

| Analysis                              | SAB   | SEM   | CHA   |
|---------------------------------------|-------|-------|-------|
| Alcohol (% v/v)                       | 13.1  | 12.8  | 12.6  |
| Glucose + Fructose (g/L)              | 0.8   | 1.1   | 0.6   |
| Malic acid (g/L)                      | 1.61  | 1.29  | 1.46  |
| pH                                    | 3.39  | 3.35  | 3.33  |
| Specific gravity                      | 0.990 | 0.991 | 0.991 |
| Sulfur Dioxide (free) (mg/L)          | 23    | 35    | 14    |
| Sulfur Dioxide (total) (mg/L)         | 135   | 132   | 70    |
| Titrateable acid pH 7.0 (g/L)         | 5.4   | 5.5   | 7.1   |
| Titrateable acid pH 8.2 (g/L)         | 5.9   | 5.9   | 7.4   |
| Volatile acidity as acetic acid (g/L) | 0.29  | <0.25 | 0.3   |
| Protein content (mg/L)                | 130   | 205   | 116   |

SAB = Sauvignon Blanc, SEM = Semillon and CHA = Chardonnay

Table S2. R2 for all the samples presented on Figure 4.

| Wine | Cleaning solvent | R2*  |
|------|------------------|------|
| CHA  | Water            | 0.88 |
|      | SDS/Water        | 0.72 |
|      | Acetone/Water    | 0.99 |
| SEM  | Water            | 0.99 |
|      | SDS/Water        | 0.82 |
|      | Acetone/Water    | 0.88 |
| SAB  | Water            | 0.83 |
|      | SDS/Water        | 0.72 |
|      | Acetone/Water    | 0.99 |

\*data were fitted with the first order exponential decay.

Table S3. Protein removal efficiency of Milli-Q water, 10% SDS/water and acetone/water for Sauvignon blanc wine treated with bare magnetic nanoparticles.

| Sample                       | Cleaning cycle for water | Removal efficiency (%) | Variation | Significance |
|------------------------------|--------------------------|------------------------|-----------|--------------|
| Bare MNPs+ SAB               | 0                        | 43 ± 4                 |           |              |
|                              | 1st                      | 46 ± 3                 | + 3       | ns           |
|                              | 2nd                      | 45 ± 2                 | + 2       | ns           |
|                              | 3rd                      | 42 ± 2                 | - 1       | ns           |
|                              | 5th                      | 47 ± 3                 | +4        | ***          |
|                              | 10th                     | 38 ± 3                 | - 5       | ***          |
| Cleaning cycle for SDS/water |                          |                        |           |              |
| Bare MNPs+ SAB               | 0                        | 41 ± 4                 |           |              |
|                              | 1st                      | 47 ± 3                 | + 6       | ***          |
|                              | 2nd                      | 42 ± 2                 | + 1       | ns           |
|                              | 3rd                      | 39 ± 2                 | - 2       | ns           |
|                              | 5th                      | 46 ± 3                 | + 5       | ***          |
|                              | 10th                     | 41 ± 3                 | 0         | ns           |
| Cleaning cycle               |                          |                        |           |              |

| for acetone/water |      |        |     |    |
|-------------------|------|--------|-----|----|
| Bare MNPs+ SAB    | 0    | 40 ± 4 |     |    |
|                   | 1st  | 41 ± 3 | + 1 | ns |
|                   | 2nd  | 41 ± 2 | + 1 | ns |
|                   | 3rd  | 38 ± 2 | - 2 | ns |
|                   | 5th  | 38 ± 4 | - 2 | ns |
|                   | 10th | 38 ± 3 | - 2 | ns |

All data are expressed as mean ± standard deviation (n=3).

According to Student t-test \*, \*\*, \*\*\* and ns indicate significance at P < 0.001, 0.01, 0.05 and not significant, respectively.

Table S4. Protein removal efficiency of Milli-Q water, 10% SDS/water and acetone/water for Semillon wine treated with bare magnetic nanoparticles.

| Sample                              | Cleaning cycle<br>for water | Removal<br>efficiency (%) | Variation | Significance |
|-------------------------------------|-----------------------------|---------------------------|-----------|--------------|
| Bare MNPs+ SEM                      | 0                           | 49 ± 4                    |           |              |
|                                     | 1st                         | 47 ± 3                    | - 2       | ns           |
|                                     | 2nd                         | 41 ± 2                    | - 8       | ***          |
|                                     | 3rd                         | 37 ± 2                    | - 12      | ***          |
|                                     | 5th                         | 34 ± 3                    | - 15      | ***          |
|                                     | 10th                        | 32 ± 3                    | - 17      | ***          |
| Cleaning cycle<br>for SDS/water     |                             |                           |           |              |
| Bare MNPs+ SEM                      | 0                           | 51 ± 4                    |           |              |
|                                     | 1st                         | 47 ± 3                    | - 4       | **           |
|                                     | 2nd                         | 42 ± 2                    | - 9       | ***          |
|                                     | 3rd                         | 42 ± 2                    | - 9       | ***          |
|                                     | 5th                         | 43 ± 3                    | - 8       | ***          |
|                                     | 10th                        | 38 ± 3                    | - 13      | ***          |
| Cleaning cycle<br>for acetone/water |                             |                           |           |              |
| Bare MNPs+ SEM                      | 0                           | 49 ± 4                    |           |              |
|                                     | 1st                         | 36 ± 3                    | - 13      | ***          |
|                                     | 2nd                         | 35 ± 2                    | - 14      | ***          |
|                                     | 3rd                         | 36 ± 2                    | - 13      | ***          |
|                                     | 5th                         | 34 ± 3                    | - 15      | ***          |
|                                     | 10th                        | 30 ± 3                    | - 19      | ***          |

All data are expressed as mean ± standard deviation (n=3).

According to Student t-test \*, \*\*, \*\*\* and ns indicate significance at P < 0.001, 0.01, 0.05 and not significant, respectively.

Table S5. Protein removal efficiency of Milli-Q water, 10% SDS/water and acetone/water for Chardonnay wine treated with bare magnetic nanoparticles.

| Sample                                      | Cleaning cycle<br>for water | Removal<br>efficiency (%) | Variation | Significance |
|---------------------------------------------|-----------------------------|---------------------------|-----------|--------------|
| Bare MNPs+<br>CHA                           | 0                           | 39 ± 4                    |           |              |
|                                             | 1st                         | 36 ± 3                    | - 3       | ns           |
|                                             | 2nd                         | 36 ± 2                    | - 3       | ns           |
|                                             | 3rd                         | 32 ± 2                    | - 7       | **           |
|                                             | 5th                         | 34 ± 3                    | - 5       | **           |
|                                             | 10th                        | 28 ± 3                    | - 11      | ***          |
| <b>Cleaning cycle<br/>for SDS/water</b>     |                             |                           |           |              |
| Bare MNPs+<br>CHA                           | 0                           | 37 ± 4                    |           |              |
|                                             | 1st                         | 43 ± 3                    | + 6       | ***          |
|                                             | 2nd                         | 40 ± 2                    | + 3       | **           |
|                                             | 3rd                         | 29 ± 2                    | - 8       | ***          |
|                                             | 5th                         | 39 ± 3                    | + 2       | ns           |
|                                             | 10th                        | 33 ± 3                    | - 4       | **           |
| <b>Cleaning cycle<br/>for acetone/water</b> |                             |                           |           |              |
| Bare MNPs+<br>CHA                           | 0                           | 36 ± 4                    |           |              |
|                                             | 1st                         | 33 ± 3                    | - 3       | **           |
|                                             | 2nd                         | 31 ± 2                    | - 5       | ***          |
|                                             | 3rd                         | 30 ± 2                    | - 6       | ***          |
|                                             | 5th                         | 31 ± 3                    | - 5       | ***          |
|                                             | 10th                        | 30 ± 3                    | - 6       | ***          |

All data are expressed as mean ± standard deviation (n=3).

According to Student t-test \*, \*\*, \*\*\* and ns indicate significance at P < 0.001, 0.01, 0.05 and not significant, respectively.

Table S6. Protein removal efficiency of Milli-Q water, 10% SDS/water and acetone/water for Sauvignon blanc wine treated with acrylic-acid plasma coated magnetic nanoparticles.

| Sample                                  | Cleaning cycle<br>for water | Removal<br>efficiency (%) | Variation | Significance |
|-----------------------------------------|-----------------------------|---------------------------|-----------|--------------|
| AcrA-MNPs+<br>SAB                       | 0                           | 100 ± 4                   |           |              |
|                                         | 1st                         | 100 ± 3                   | 0         | ns           |
|                                         | 2nd                         | 97 ± 2                    | - 3       | ns           |
|                                         | 3rd                         | 94 ± 2                    | - 6       | **           |
|                                         | 5th                         | 96 ± 3                    | - 4       | ns           |
|                                         | 10th                        | 88 ± 3                    | - 12      | ***          |
| <b>Cleaning cycle<br/>for SDS/water</b> |                             |                           |           |              |
| AcrA-MNPs+<br>SAB                       | 0                           | 100 ± 4                   |           |              |

|                                             |      |         |      |     |
|---------------------------------------------|------|---------|------|-----|
|                                             | 1st  | 100 ± 3 | 0    | ns  |
|                                             | 2nd  | 98 ± 2  | - 2  | ns  |
|                                             | 3rd  | 98 ± 2  | - 2  | ns  |
|                                             | 5th  | 98 ± 3  | - 2  | ns  |
|                                             | 10th | 98 ± 3  | - 2  | ns  |
| <b>Cleaning cycle<br/>for acetone/water</b> |      |         |      |     |
| AcrA-MNPs+<br>SAB                           | 0    | 100 ± 4 |      |     |
|                                             | 1st  | 96 ± 3  | - 4  | *   |
|                                             | 2nd  | 92 ± 2  | - 8  | *** |
|                                             | 3rd  | 89 ± 2  | - 11 | *** |
|                                             | 5th  | 84 ± 4  | - 16 | *** |
|                                             | 10th | 76 ± 3  | - 24 | *** |

All data are expressed as mean ± standard deviation (n=3).

According to Student t-test \*, \*\*, \*\*\* and ns indicate significance at P < 0.001, 0.01, 0.05 and not significant, respectively.

Table S7. Protein removal efficiency of Milli-Q water, 10% SDS/water and acetone/water for Semillon wine treated with acrylic-acid plasma coated magnetic nanoparticles.

| Sample                                      | Cleaning cycle<br>for water | Removal<br>efficiency (%) | Variation | Significance |
|---------------------------------------------|-----------------------------|---------------------------|-----------|--------------|
| AcrA-MNPs+<br>SEM                           | 0                           | 100 ± 4                   |           |              |
|                                             | 1st                         | 95 ± 3                    | - 5       | **           |
|                                             | 2nd                         | 93 ± 2                    | - 7       | **           |
|                                             | 3rd                         | 90 ± 2                    | - 10      | ***          |
|                                             | 5th                         | 87 ± 3                    | - 13      | ***          |
|                                             | 10th                        | 85 ± 3                    | - 15      | ***          |
| <b>Cleaning cycle<br/>for SDS/water</b>     |                             |                           |           |              |
| AcrA-MNPs+<br>SEM                           | 0                           | 100 ± 4                   |           |              |
|                                             | 1st                         | 98 ± 3                    | - 2       | ns           |
|                                             | 2nd                         | 97 ± 2                    | - 3       | ns           |
|                                             | 3rd                         | 96 ± 2                    | - 4       | **           |
|                                             | 5th                         | 96 ± 3                    | - 4       | **           |
|                                             | 10th                        | 96 ± 3                    | - 4       | **           |
| <b>Cleaning cycle<br/>for acetone/water</b> |                             |                           |           |              |
| AcrA-MNPs+<br>SEM                           | 0                           | 100 ± 4                   |           |              |
|                                             | 1st                         | 85 ± 3                    | - 15      | ***          |
|                                             | 2nd                         | 85 ± 2                    | - 15      | ***          |
|                                             | 3rd                         | 83 ± 2                    | - 17      | ***          |
|                                             | 5th                         | 78 ± 4                    | - 22      | ***          |
|                                             | 10th                        | 75 ± 3                    | - 25      | ***          |

All data are expressed as mean ± standard deviation (n=3).

According to Student t-test \*, \*\*, \*\*\* and ns indicate significance at  $P < 0.001$ , 0.01, 0.05 and not significant, respectively.

Table S8. Protein removal efficiency of Milli-Q water, 10% SDS/water and acetone/water for Chardonnay wine treated with acrylic-acid plasma coated magnetic nanoparticles.

| Sample                                      | Cleaning cycle<br>for water | Removal<br>efficiency (%) | Variation | Significance |
|---------------------------------------------|-----------------------------|---------------------------|-----------|--------------|
| AcrA-MNPs+<br>CHA                           | 0                           | 100 ± 4                   |           |              |
|                                             | 1st                         | 100 ± 3                   | 0         | ns           |
|                                             | 2nd                         | 95 ± 2                    | - 5       | **           |
|                                             | 3rd                         | 94 ± 2                    | - 6       | **           |
|                                             | 5th                         | 93 ± 3                    | - 7       | ***          |
|                                             | 10th                        | 92 ± 3                    | - 8       | ***          |
| <b>Cleaning cycle<br/>for SDS/water</b>     |                             |                           |           |              |
| AcrA-MNPs+<br>CHA                           | 0                           | 100 ± 4                   |           |              |
|                                             | 1st                         | 100 ± 3                   | 0         | ns           |
|                                             | 2nd                         | 98 ± 2                    | - 2       | ns           |
|                                             | 3rd                         | 98 ± 2                    | - 2       | ns           |
|                                             | 5th                         | 98 ± 3                    | - 2       | ns           |
|                                             | 10th                        | 98 ± 3                    | - 2       | ns           |
| <b>Cleaning cycle<br/>for acetone/water</b> |                             |                           |           |              |
| AcrA-MNPs+<br>CHA                           | 0                           | 100 ± 4                   |           |              |
|                                             | 1st                         | 94 ± 3                    | - 6       | **           |
|                                             | 2nd                         | 90 ± 2                    | - 10      | ***          |
|                                             | 3rd                         | 88 ± 2                    | - 12      | ***          |
|                                             | 5th                         | 87 ± 4                    | - 13      | ***          |
|                                             | 10th                        | 86 ± 3                    | - 14      | ***          |

All data are expressed as mean ± standard deviation (n=3).

According to Student t-test \*, \*\*, \*\*\* and ns indicate significance at  $P < 0.001$ , 0.01, 0.05 and not significant, respectively.

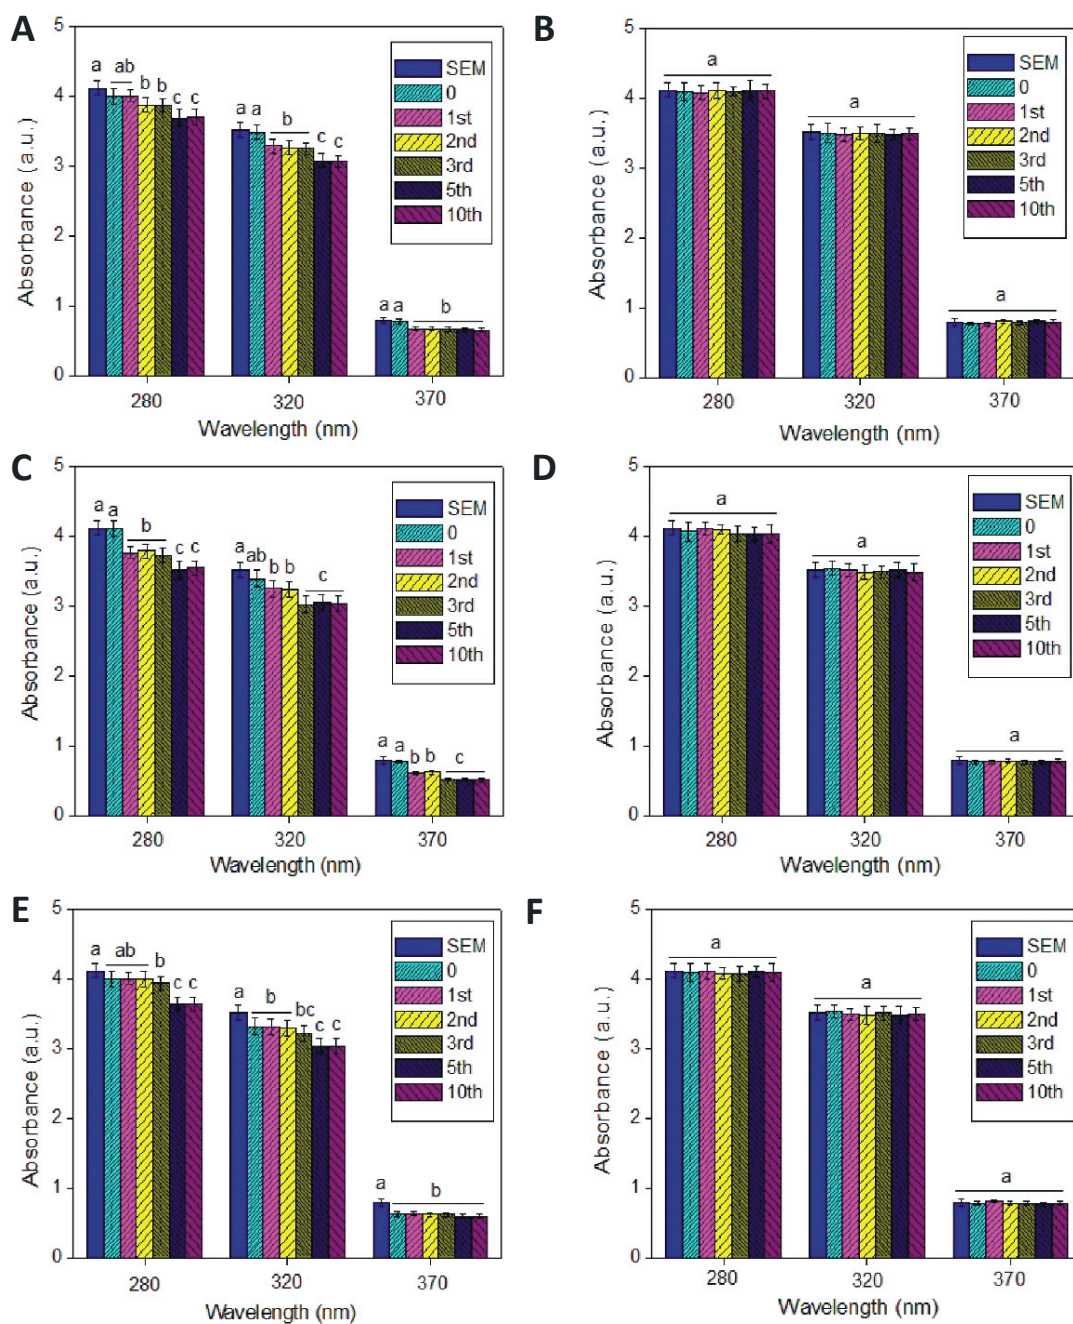

Figure 1. Phenolic content of Semillon wine before and after treatment with bare (A, C, E) and acrylic acid plasma coated magnetic nanoparticles (B, D, F). Three cleaning solvents were used: A and B Milli-Q water, C and D SDS, E and F acetone.

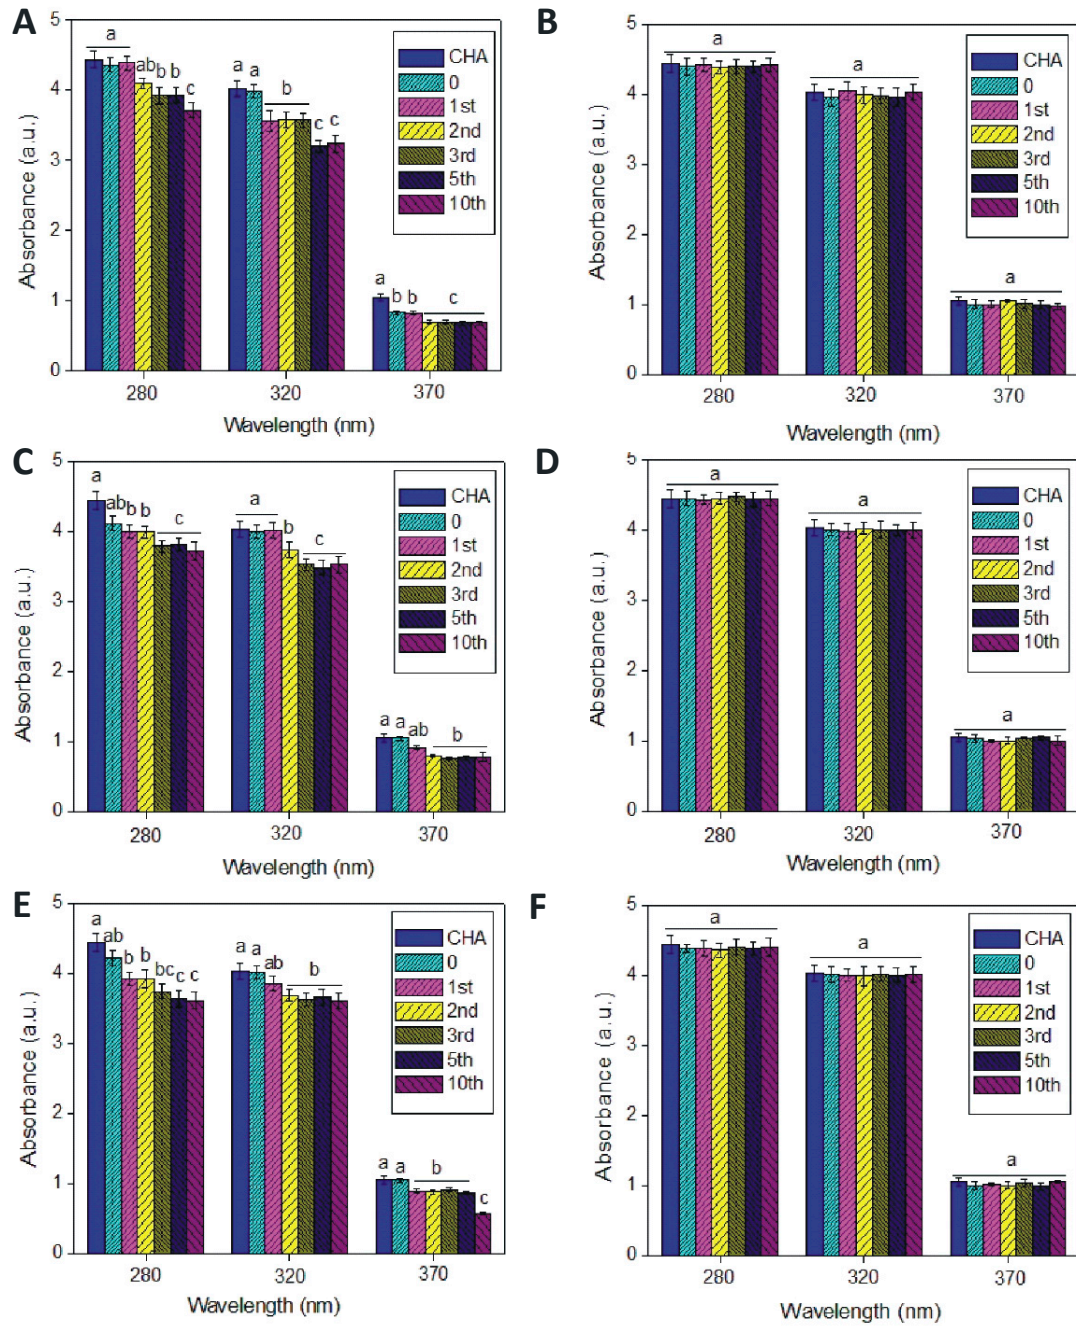

Figure S2. Phenolic content of Chardonnay wine before and after treatment with bare (A, C, E) and acrylic acid plasma coated magnetic nanoparticles (B, D, F). Three cleaning solvents were used: A and B Milli-Q water, C and D SDS, E and F acetone.



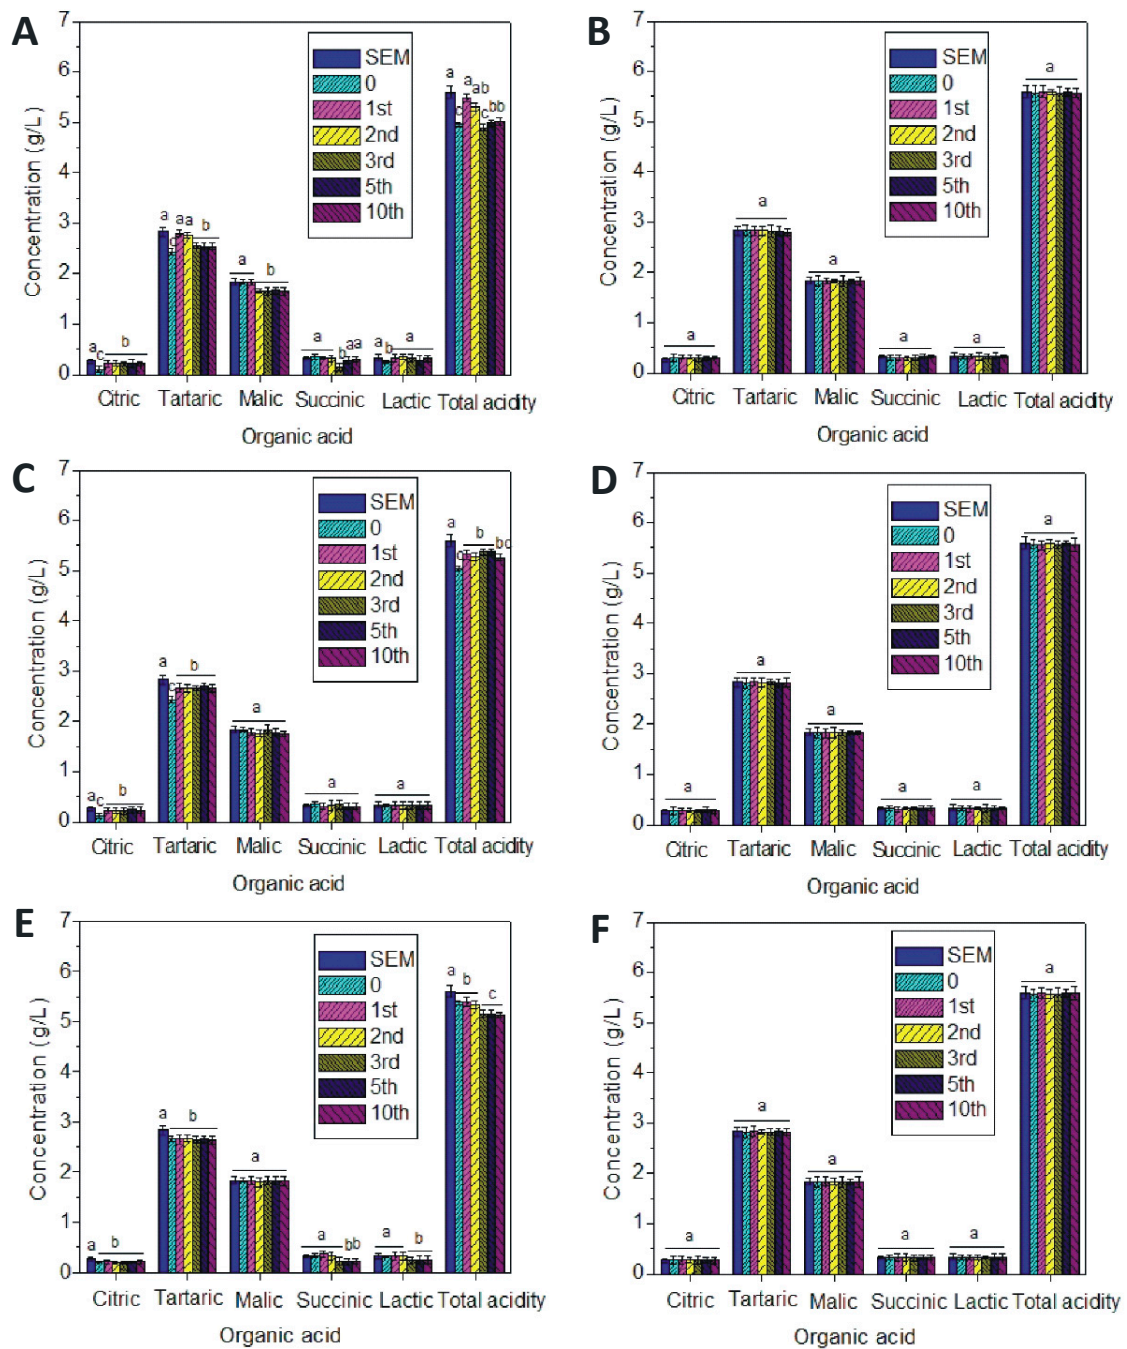

Figure S3. Organic acids concentration of Semillon wine before and after treatment with bare (A, C, E) and acrylic acid plasma coated magnetic nanoparticles (B, D, F). Three cleaning solution were used: A and B Milli-Q water, C and D SDS, E and F acetone.

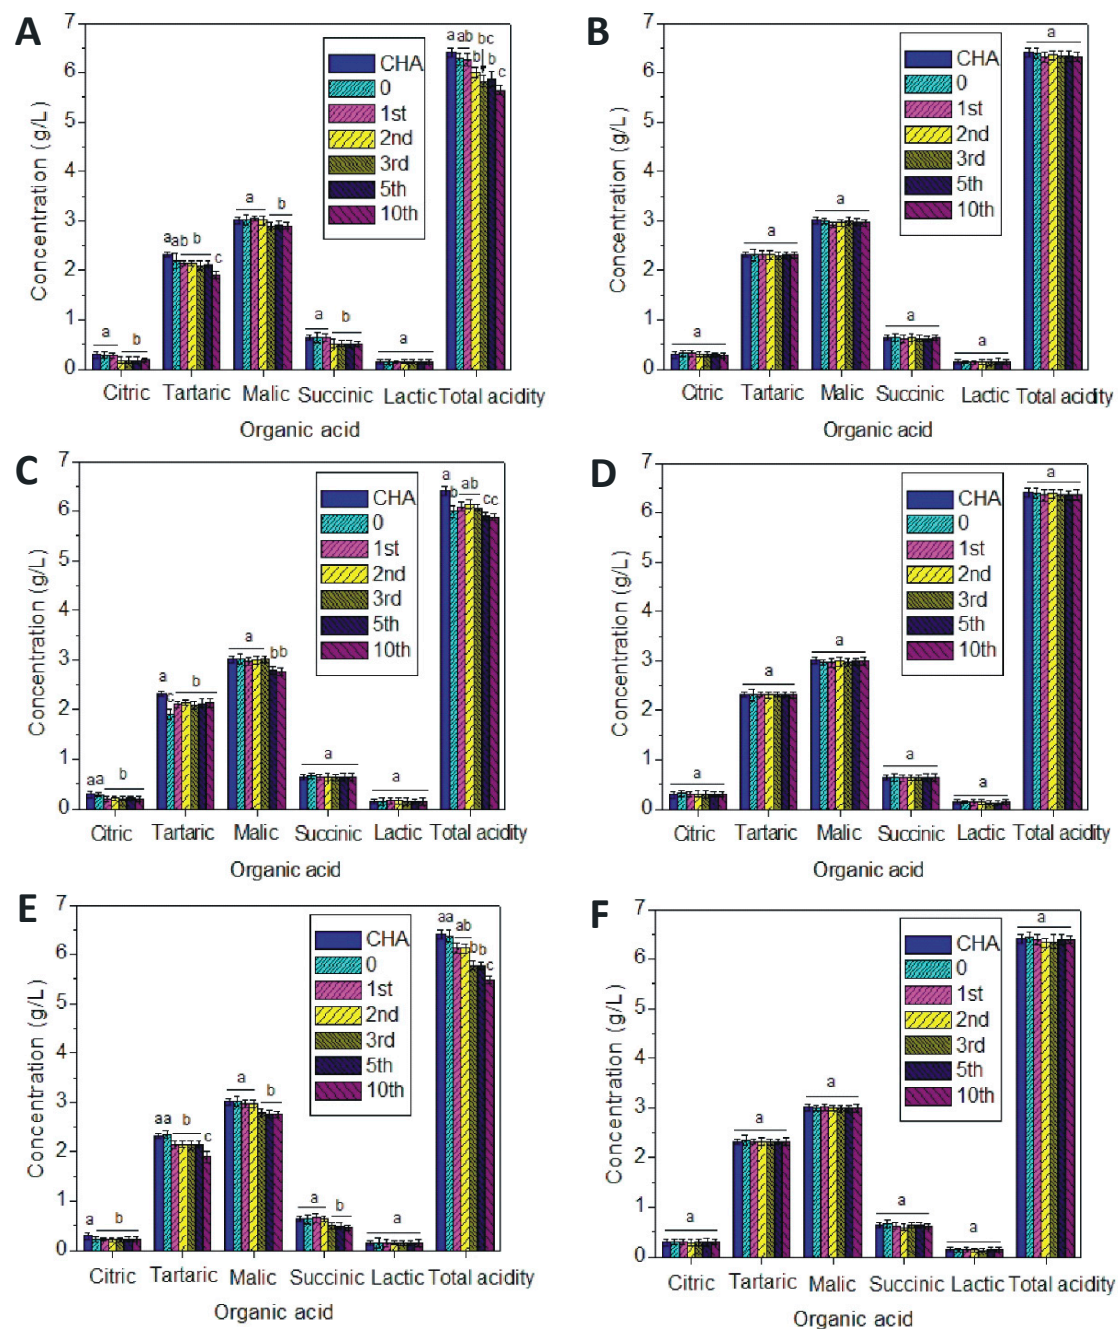

Figure S4. Organic acids concentration of Chardonnay wine before and after treatment with bare (A, C, E) and acrylic acid plasma coated magnetic nanoparticles (B, D, F). Three cleaning solution were used: A and B Milli-Q water, C and D SDS, E and F acetone.
